# Supplementary material for: Silencing of Two Insulin Receptor Genes Disrupts Nymph-Adult Transition of Alate Brown Citrus Aphid
Source: PubMed Central journal article supplement (PMC5343892; doi:10.3390/ijms18020357), 2017-02-21
Supplement: ijms-18-00357-s001.pdf [file ijms-18-00357-s001.pdf]

```

1   ATGCCCTCATGAACGGGTGGTGGATCGCTGCTGGCTGGTGGCTGCTGACGACCGGGCCGCGAGGAGAGGTGGCGGACATCGACGTCGCGAACAGCGGGACCG
1   M P S M N G W W I A F V W L W S L S V T T A A V E E K V C G S I D V R N S G D R
121  CTGTCCGGCTTGCACAACTGCACCACTCCAGGGTTCCTGCGAGTCTGCTGCTGATGCGCACCAACCGCTCCGACTTCGACATCAGCTTCCCGCTTGGCGGAGATCACTGACATG
21  L S A L H N C T I V Q G S V Q I V L L D A T K P S D F D I S F P L L R E I T Q Y
241  CTGTGCTGTACCGGCTGGCGGCTGTACAACCTGGGAAGCTGTCCCGAACCTGATGCTATCCGGGACGACAGTCTCTATTCCCGGACTGGCGCTCATGTCACGCAAC
81  L V V Y R V A G L Y N L G K L F P N L M L I R G T H S P H F P G L A L M H D N
361  CTGACCTCAGGAGATCGGACTGTACAGCTGACCAACATCAGCGGGGTCCTGGTATCTTGGAAAACCTAAATTTGTCAGGGGAACAACATCGATTTGGGGTCAATGGCCAA
121  L D L R E I G L Y S L T N I T R G S V I I S K N P K L C H A T T I D W G Q I A N
481  GGAGTGAGCAACACATACCTGATCAGCAACGAGCACTATAAATGTATGGATGCTCTAATATTGGCTGCGGGAGACCTGTGCTGTCACAGATCCCGTCCAGTCTGAGTAC
161  G V S N D I N V I S N D E P I K C N G C S N I G C P G D L C W S H D P V Q C Q Y
601  GGGAGATGAACGGTTGCCATCCATTGTGCGCTGTGGCTGTGACGAACCGCATCTGCGCAGACATGTTTGGTGCACCGGATCATGTACAAGGGGAATGCATCAAGAATGTCCA
201  G R L N G C H P L C A G G C D E P H S A R H C F A C T A Y M Y K G E C I K E C P
721  TAGCGCTGTATGCTCACATCAGTCTGTTTCCCGCAAGAGTGTCTGCTGCTCCGGTACGAGAGAATGCACCGGAGCTTTTAAACACACACTACATCCCGTTCGAACGC
241  Y G L L Y G H I R S C L T A E E C Y S L P V S R E E S T P D V L N T H Y I P F E R
841  GTTTGTCGGGATGCTCCGATCAGGATCGAGGTGAGGTGGATAAAGAATGTACACTGCTGCACAAGACGAGATCCGACACTGTACGGGAACTGTAATGTTTCAAGATCAGC
281  V C R D E C P Y G F E V T V D K R N C T L C T K T R Y G H C Q R N C N S F K I S
961  GATGACATGTTGGAAGAACTATGAATATGTTTACACACCACTGTACAACAATCAAGTCTCTGGAGATCGAAGTCAAGTACGGCAGGATGAGGATGAGAAGCTGATAGAAGA
321  D D M L R K N Y E Y R L H T N C T T I K S L E I E V K Y G T S E D V E R R L E E
1081  TACATTCGCAAGTAGAAGTATTTGGATCAGTAAAAATCATACGGTGGTATTCGCTGACTCTTGAATTTCTGGGAAGTCTGTAGAAATACCGGTTGAAAATCTGTTAAATA
361  Y I G K V E V I L D Q L K I I R S Y S L N S L N F L R S L Y E I R G E N T V N K
1201  ATGGCTTTGGTATTTCGGCAATAAAAAATTTACAAGACTTTGGACCAACAGTGAACGAGACTGCGCCGTAAGATATTGAACGGCAGCATCTTTTATTCACTCAAGATTA
401  M A L V I R G N K N L Q R L W T N S E N E T R P V K I L N G T V S F H Y N P K L
1321  TGTATGACAAATATAAATTTGGAATTTATCTGCTGCTGCTCTCAGATATAGAAGTGTCTGTATATGAAATGGGATCAGTTCGATGATCTTATAAATTAAGATGA
441  C M S E I Y K F G N L S S L P A F S D I E V S V I S N G D Q F A C T V Y N L Q V
1441  GAAACCGTAAATCGAACCAACTATTGTTGACAAATGCACAACCGTGAAGCAGATCATTGGAAGTTTCTGTGATTTTATGAAGCATTAAGAAAGTAAAGTAA
481  E T V Y K I E P Q S I V L Q M H K P V E A D H L E R F L V Y F I E A S K W N E T I
1561  GAAACACCGTAAATCGAACCAACTATTGTTGAAATGATGATATAGTTCAAAAAGTTTCAACGACTGAAATTTACATGCTATTGAAACCAACACAGACTGAT
521  E T T D C E D S S W K I D D I S S K K V F N D T E I Y H V I T N L E P N T E Y I
1681  TATTATGAAAGACTTACAGGATTTCTCAAGACTAGTATGATGATGATTCGATGTAAGACACTACCATAAAGCCGTCGCTCCTCAATCTCAGTCTCAACCATGCTGCTAGT
561  Y V V K I Y T I S S K T S M S S V F R S K T L P S K P S A P Q Y F T A Q P L S
1801  TCTGAAGTAGACTTACATGAAACCTCTTCCACATCTCTGAAATTAAGTCAATATACATATTAAGGAAATTCATTAACGATGACCAAGCCATTTGGGACAGCTACTGCTG
601  S E V E L T W K P P S H P H G K L V K Y I I K G I H L T D D Q A I L D E R S Y T
1921  AGAACAAAGCAATATGGAACAGGCACTAATAATCCACCACTCAATATTAACCATCCGATGATACATGTAACCAAGCTGAAACAGTGAACCTCAAAAGACTGTTGATGATAAT
641  R N K T I N G N G I T H K S T T S I I K P S D D T C E K Q C E P Q K N T V D N I
2041  TGCAACTTGAACACGGTATAGACATGATTAATTCATTAACAATCAACAGTATACATTTGAATCGTGCAGCAGTAACTTCTTAATATCTTATAATCAAAATTTGGGCA
681  C N T F E H G I D M D L I S L N N H K Y T F E S C S S N I L N I F I N S K L A
2161  ATGCAAAACAAAGCAGCACTATCTTCCAAATATAAATGAAACTGTACAGAAATGGTGGTCAAGTAAATATGAAACAACTCACTATAAAGATGATGATCTATTTTC
721  M Q N N D D T I F P N I I N E N C T E M W S V S N I L N N Y T H K D G S S S Y F
2281  CAGTACCACTAAATGAAATGTTACATCAATTAATCTGTAACCTTAGCCATTACAGTCAATATTTGTTGCCATATGGTTGTAGAGAAGTGGTCAACGAAGATTAACCTAAGT
761  Q I Q L N E N V T S F N L G N L R H Y S Q Y L L S I L L V C R E V Y V K Q E I L S
2401  AATATCAATCTGTAGTCAAGAGACATTAATCTCCGCACTTGGAAAATAGCAGGACAGATATATGATAGGATAGTACAATATGTTGTTGAAATACACACTGTTAAT
801  N I N S C S Q E T L I S F R T L E N K Q A D I D S D S V Q Y V V V N N H T V N
2521  ATATCTGGGAGTCACCACTTATAAATAGTATATACATAGTTCCAGTTGGAATATAAGCGCTCGGATCGCCCAATTTGTTCTGTATGATTAATGAAAGGATGATAAA
841  I S W E S P T L I N S I L H S F Q L E Y K R S D A P N F V S V C I T M K E Y E N
2641  GCTGGCCGATCATGTCTCAAGAACTACAGCCTGGTCTTACCAATACAAAATCAAAGCTGTTCTTTGTATAAAGCTGGCCATTCACACTGGAAGAGTTTAACTTCCATAT
881  A G R S S Y V F K N L Q P G A Y Q Y K I Q A V S L Y K P G P F T T V K E F N L P Y
2761  CCAGACTATTAAACAGTGAACCTTATCTCATAATTTTCAATTTGGCTGTTTAAATTTTAAACAGTATATATATTCGTACACACTTATGCTGAAGATTTTGGAACTGAT
921  P D S F N [ S W N L I L I I F I C G C L L I L L T V Y Y ] R T H F S R K I L E R N
2881  ACCATGTTTAAATAGCCAACTCTGGCTATGTTGTTATATGTTGAGGACAAATTTGAGATACCTCGAGATGATTAATATACAAAAATCTGCGTAGAGGACATTTGGCACA
961  T M F N L A N N P G Y V G I Y V E D E F E I P R D D V I I Q K I L G R G T F G T
3001  GTTCAGCAAGCTGCTATGCTGATCCATACCATGCTGTAATCTGTTAGCAAGACAACTTTTGAATATCATGACAGTCTTAAACGAGCAGCATATAAGAAAGTTG
1001  V H E G L L M P D S I P C A V K S V S K T N F L R Y H A E F L N E A A I M K K F
3121  AGGGAACATACATATAGTGAGATGCTTGGTGGTGAAGCAACCTACCACTACTGTAATGGAACCTATGGCCGCTGGTATTGAAAAGTGTATTTGGTAAAGTCAAGGAT
1041  S E A Y H I V R L L G V V T K T H P P L L V M E L M G R G D L K S V L V K C R D
3241  TCTGATGACCTACCGCACTAACAGATATACTATCATGATGCTGACAAATAGCTGATGATGACATTCAGAAATATAAATAATTTATTCATGCTGATTTGGCAGCCGAAAT
1081  S D D L P P P N R Y T I I R M A A Q I A D G M A F L E Y N K F I H R D L L A A R N
3361  TGTATGCTGCTAATGATGACTGTGAAAATTTGGTATTGTTGATGAGTCGACAAATATAATGTTGATTTATTCGTAAGGAAATAGGGTGAATGCCTATACGGTGGATGGCT
1121  C M V A N D M T V K I G D F G M S R Q I Y N G D Y Y R K G N K G E M P R W M A
3481  CCCGAGACTTATGAAAGTATATTTACTAGTCAATCGGATGTTGGAGTTACGGGTTGTTGCTGGAAATGATGACATAGGAGCACAACCTACTCAGAAAAGATTAACATGAA
1161  P E S L S E G I F T S Q S D V W S Y G V V I W E M M T L G A Q P Y S E K S N N E
3601  GTCATGGCACATGCTGATGATGACTACTACTGCAATATTTGCTGATGTTGGCTGATTTGATGATGATGTTGAAATGGACTGCTTCAACGACCAAGCTTCTTA
1201  V M A H V L D G N L L N L P I F C P D V L A G I V R L C W N W T A S Q R P R F L
3721  AAAATAGTCGAACACTGATGTTATCTGGAGGATGATTCAGATCAGTTTCGTTTATACACAGTGGTTACACAATGAATCACCTGCGATCAATGTTGATGCTGCGCATGACT
1241  K I V E T L D V Y L E D D F R S V S F Y H T R G L H N E S P A D Q S L M S P C T
3841  ACATATGAAGAAGATGATGATAAAGAACTTTCTTTGAAAGTGGTGCACACTGTTGCTGATATAGTGGCTTCCATGTAGACAAAAATAAATGAGTAATGGCATTATTCGCCAATG
1281  T Y E E D V D N E S I S F E G G D T V A V Y S A F H V D K N K M S N G H L S P M
3961  TAA
1321  *

```

**Figure S2.** Nucleotide and deduced amino acid sequences of *AcInR2* from *Aphis (Toxoptera) citricida*. The start codon (ATG), stop codon (TGA) are highlighted in black. The furin-like cysteine-rich (Fu) region is underlined with red wavy lines. Three fibronectin type 3 (FN3) domains are labeled with yellow solid underlines. A single transmembrane (TM) region is highlighted with a box. An “NPXY” motif is shown in green. The highly conserved tyrosine kinase domain (TyrKc) is indicated in blue. A triple tyrosine cluster (YXXXYY) is indicated in red.

**Table S1.** Primer sequences used for cloning, quantitative real-time PCR and double-stranded RNA (dsRNA) synthesis.

| Experiments              | Primer Names and Sequence (5' to 3')                         | Amplification Efficiency | Product Length |
|--------------------------|--------------------------------------------------------------|--------------------------|----------------|
| Full-length confirmation | <i>InR1</i> -F: ATGTGTGGAGAGTGTGACAA                         | -                        | 4473           |
|                          | <i>InR1</i> -R: TCAGCATATAGTGGTATTTAT                        |                          |                |
|                          | <i>InR2</i> -F: ATGCCGTCCATGAACGGGTG                         | -                        | 3963           |
|                          | <i>InR2</i> -R: TTACATTGGCGATAAATGGCC                        |                          |                |
| qPCR analysis            | Q- <i>InR1</i> -F: ATGGTTCGAGATGCTTGTGGA                     | 98.2%                    | 217            |
|                          | Q- <i>InR1</i> -R: TGTGGAGGACTTGGAGTTCC                      |                          |                |
|                          | Q- <i>InR2</i> -F: TTCCCGAACCTGATGCTGAT                      | 96.3%                    | 204            |
|                          | Q- <i>InR2</i> -R: GCTCACTCCATTGGCGATTT                      |                          |                |
|                          | Q- <i>EF1α</i> -F: GATGCACCTGGTCACAGAGA                      | 96.5%                    | 194            |
|                          | Q- <i>EF1α</i> -R: CCATCTTGTTCACACCAACG                      |                          |                |
| dsRNA synthesis          | ds <i>AcInR1</i> -F: taatacgaactactatagggTTGTGGGATTGGAGTACTC | -                        | 511            |
|                          | ds <i>AcInR1</i> -R: taatacgaactactatagggCACTTTGTGCACCATTAGA |                          |                |
|                          | ds <i>AcInR2</i> -F: taatacgaactactatagggAACCTAAATTGTGTCACG  | -                        | 609            |
|                          | ds <i>AcInR2</i> -R: taatacgaactactatagggGACTTCGATCTCCAGAGAC |                          |                |
|                          | ds <i>GFP</i> -F: taatacgaactactatagggCAGTTCTTGTGAATTAGATG   | -                        | 436            |
|                          | ds <i>GFP</i> -R: taatacgaactactatagggTTTGGTTTGTCTCCCATGATG  |                          |                |

InR, insulin receptor; dsRNA, double-stranded RNA; *EF1α*, elongation factor 1α; F, forward; R, reverse; Ac, *Aphis (Toxoptera) citricida*. The lower case letters represent the T7 promoter sequences for efficient in vitro transcription in dsRNA synthesis.

**Table S2.** Sequences and relevant information used for phylogenetic analysis of the insulin receptor genes.

| Genes          | GenBank No. or Gene ID         | Species                             |
|----------------|--------------------------------|-------------------------------------|
| <i>BgInR</i>   | CDI30232.1                     | <i>Blattella germanica</i>          |
| <i>ZnInR1</i>  | KDR13786.1                     | <i>Zootermopsis nevadensis</i>      |
| <i>ClInR1</i>  | XP_014256336.1                 | <i>Cimex lectularius</i>            |
| <i>HhInR1</i>  | XP_014273515.1                 | <i>Halyomorpha halys</i>            |
| <i>NlInR1</i>  | AIY24638.1                     | <i>Nilaparvata lugens</i>           |
| <i>AcInR1</i>  | KX507134                       | <i>Aphis (Toxoptera) citricida</i>  |
| <i>DnInR1</i>  | XP_015375915.1                 | <i>Diuraphis noxia</i>              |
| <i>ApInR1</i>  | XP_008185917.1                 | <i>Acyrtosiphon pisum</i>           |
| <i>MpInR1</i>  | MYZPE13164_G006_v1.0_000181710 | <i>Myzus persicae</i>               |
| <i>PhInR</i>   | XP_002430961.1                 | <i>Pediculus humanus corporis</i>   |
| <i>NvInR</i>   | XP_003425750.1                 | <i>Nasonia vitripennis</i>          |
| <i>AmInR1</i>  | NP_001233596.1                 | <i>Apis mellifera</i>               |
| <i>BiInR1</i>  | XP_003490625.1                 | <i>Bombus impatiens</i>             |
| <i>SiInR1</i>  | XP_011158641.1                 | <i>Solenopsis invicta</i>           |
| <i>CfInR1</i>  | XP_011251746.1                 | <i>Camponotus floridanus</i>        |
| <i>HsaInR1</i> | XP_011144146.1                 | <i>Harpegnathos saltator</i>        |
| <i>OnInR</i>   | AFQ20827.1                     | <i>Onthophagus nigriventris</i>     |
| <i>TcInR1</i>  | XP_008199415.1                 | <i>Tribolium castaneum</i>          |
| <i>BmInR</i>   | XP_012549124.1                 | <i>Bombyx mori</i>                  |
| <i>PxInR</i>   | XP_011567916.1                 | <i>Plutella xylostella</i>          |
| <i>AaInR</i>   | AAB17094.1                     | <i>Aedes aegypti</i>                |
| <i>DmInR</i>   | ACY01695.1                     | <i>Drosophila melanogaster</i>      |
| <i>GmInR</i>   | AFQ01096.1                     | <i>Glossina morsitans morsitans</i> |
| <i>BdInR</i>   | XP_011210333.1                 | <i>Bactrocera dorsalis</i>          |
| <i>CcInR</i>   | XP_004518075.1                 | <i>Ceratitis capitata</i>           |
| <i>CfInR2</i>  | XP_011263722.1                 | <i>Camponotus floridanus</i>        |

Table S2. Cont.

| Genes          | GenBank No. or Gene ID         | Species                            |
|----------------|--------------------------------|------------------------------------|
| <i>SlInR2</i>  | XP_011175961.1                 | <i>Solenopsis invicta</i>          |
| <i>HsaInR2</i> | XP_011140707.1                 | <i>Harpegnathos saltator</i>       |
| <i>AmInR2</i>  | XP_394771.4                    | <i>Apis mellifera</i>              |
| <i>BiInR2</i>  | XP_003484422.1                 | <i>Bombus impatiens</i>            |
| <i>ZnInR2</i>  | KDR21367.1                     | <i>Zootermopsis nevadensis</i>     |
| <i>ClInR2</i>  | XP_014242610.1                 | <i>Cimex lectularius</i>           |
| <i>HhInR2</i>  | XP_014273071.1                 | <i>Halyomorpha halys</i>           |
| <i>NlInR2</i>  | AIY24639.1                     | <i>Nilaparvata lugens</i>          |
| <i>TcInR2</i>  | AHF20215.1                     | <i>Tribolium castaneum</i>         |
| <i>AcInR2</i>  | KX507135                       | <i>Aphis (Toxoptera) citricida</i> |
| <i>DnInR2</i>  | XP_015363980.1                 | <i>Diuraphis noxia</i>             |
| <i>ApInR2</i>  | XP_001942660.2                 | <i>Acyrthosiphon pisum</i>         |
| <i>MpInR2</i>  | MYZPE13164_G006_v1.0_000187240 | <i>Myzus persicae</i>              |
| <i>HsInR</i>   | NP_001073285.1                 | <i>Homo sapiens</i>                |
